# Supplementary material
Source: HighWire-hosted journal article supplement (http://ajnr-stage2.highwire.org/highwire/filestream/52546/field_highwire_adjunct_files/0/3932_figure.pdf)
Supplement: 3932_figure.pdf [file 3932_figure.pdf]

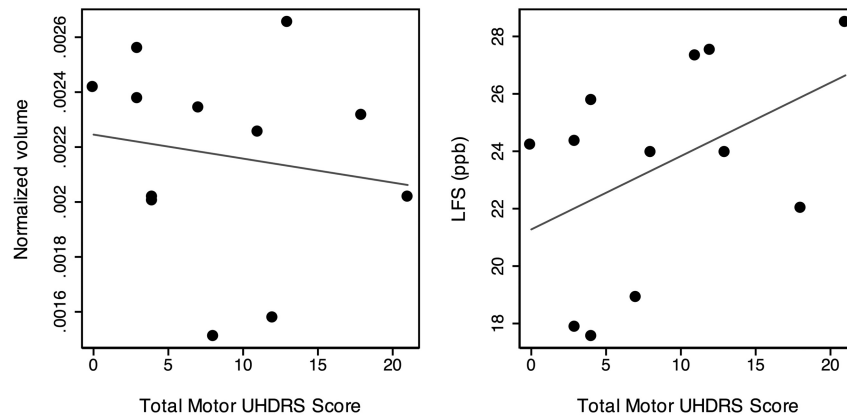

**ON-LINE FIGURE.** Scatterplots illustrating relationships between normalized volume and total motor UHDRS score (left) and LFS and total motor UHDRS score (right). If one accounted for age, neither normalized volume ( $P = .97$ ) nor LFS ( $P = .63$ ) correlated with total motor UHDRS score.
